# Supplementary material for: Calibration verification for stochastic agent-based disease spread models
Source: PubMed Central journal article supplement (PMC11630602; doi:10.1371/journal.pone.0315429), 2024-12-10
Supplement: pone.0315429.s002.pdf [file pone.0315429.s002.pdf]

# Calibration verification for stochastic agent-based disease spread models

Maya Horii<sup>1</sup>, Aidan Gould<sup>1</sup>, Zachary Yun<sup>1</sup>, Jaideep Ray<sup>2</sup>, Cosmin Safta<sup>2</sup>, Tarek Zohdi<sup>1</sup>

**1** Mechanical Engineering Department, University of California, Berkeley, Berkeley, California, United States

**2** Data Sciences and Computing Department, Sandia National Laboratories, Livermore, CA, United States

\* mjhorii@berkeley.edu

## S2 Appendix: AMCMC details

The proposal distribution is a Gaussian centered at the current chain value with covariance  $C_i$ . The algorithm has two phases: During the non-adaptive period (prior to  $\nu$  iterations),  $C_i$  is adjusted if the fraction of (rejections since last scaled)/(total samples since last scaled) is greater than 0.95 or less than 0.05, in which case the proposal standard deviation is scaled down or up respectively by a chosen scale factor value. During the adaptive period,  $C_i$  is updated intermittently (every  $n_a$  iterations) using a recursive update shown below in Eqs. 1 and 2,

$$\text{cov}(\theta_0, \dots, \theta_i) = \frac{i-1}{i} \text{cov}(\theta_0, \dots, \theta_{i-1}) + \frac{i+1}{i^2} (\theta_i - \bar{\theta}_i)(\theta_i - \bar{\theta}_i)^T \quad (1)$$

$$C_i = \begin{cases} s_d \text{cov}(\theta_0, \dots, \theta_{i-1}), & \text{if } i \geq \nu \text{ AND } \text{cov}(\theta_0, \dots, \theta_{i-1}) \text{ is non-singular} \\ s_d \text{cov}(\theta_0, \dots, \theta_{i-1}) + s_d \epsilon_c I_d, & \text{if } i \geq \nu \end{cases} \quad (2)$$

where  $s_d$  is a parameter,  $I_d$  is the identity matrix with dimension  $d$ , and  $\epsilon_c$  is a chosen small value.

We use  $s_d = 2.4^2/d$  [1] and  $\epsilon_c = 1 \times 10^{-10}$ . Initial covariance for the one-parameter case was  $C_0 = 0.001$ , and for the two-parameter case was  $C_0 = 0.001I_d$ . The covariance is updated every  $n_a = 100$  iterations during the adaptive period.

---

**Algorithm 1** AMCMC Algorithm

---

```
1: samples[0] ← init_theta
2: rej = 0, n = 0,
3: for k = 0 to n_steps-1 do
4:   if k = 0 then
5:     cov ← init_cov
6:     proposal_cov ← init_cov
7:     last_update ← 1
8:   else
9:     if freq_adapt > 0 & (k + 1)%freq_adapt = 0 & then
10:      if k < na_period then
11:        if rej/n > 0.95 then
12:          Scale down proposal standard deviation by scale_factor
13:        else if rej/n < 0.05 then
14:          Scale up proposal standard deviation by scale_factor
15:        end if
16:        rej = 0, n = 0
17:      else
18:        Recompute covariance matrix recursively with data from
19:        samples[last_update:last_update+freq_adapt]
20:        last_update ← last_update+freq_adapt
21:        if cov is singular then
22:          cov += (identity matrix)*cov_eps
23:        end if
24:        Scale proposal covariance by s_d
25:      end if
26:    end if
27:  end if
28:  Generate proposal theta.
29:  if theta is within bounds then
30:    Calculate likelihood, accept or reject based on Metropolis procedure.
31:  else
32:    Reject proposal.
33:  end if
34:  if Proposed theta is accepted then
35:    samples[k+1]=theta
36:  else
37:    samples[k+1]=samples[k]
38:    rej += 1
39:  end if
40:  n += 1
41: end for
```

---

## References

1. Haario H, Saksman E, Tamminen J. An Adaptive Metropolis Algorithm. *Bernoulli*. 2001;7(2):223. doi:10.2307/3318737.
