# Supplementary material for: Calibration verification for stochastic agent-based disease spread models
Source: PubMed Central journal article supplement (PMC11630602; doi:10.1371/journal.pone.0315429), 2024-12-10
Supplement: pone.0315429.s003.pdf [file pone.0315429.s003.pdf]

# Calibration verification for stochastic agent-based disease spread models

Maya Horii<sup>1</sup>, Aidan Gould<sup>1</sup>, Zachary Yun<sup>1</sup>, Jaideep Ray<sup>2</sup>, Cosmin Safta<sup>2</sup>, Tarek Zohdi<sup>1</sup>

**1** Mechanical Engineering Department, University of California, Berkeley, Berkeley, California, United States

**2** Data Sciences and Computing Department, Sandia National Laboratories, Livermore, CA, United States

\* mjhorii@berkeley.edu

## S3 Appendix: Simulation-based calibration results for calibration method 1 (Bayesian inference using MCMC)

### One-parameter case

After collecting 75,000 MCMC iterations, discarding 25,000 for burn-in, then thinning based on the ESS of the chain, the shortest thinned chain contains 60 iterations. By setting  $L = 50$ , we do not need to use the rank approximation (Eq. 6) on any samples. Therefore, the results in Fig 11A directly follow the thinning and truncation procedure presented in Talts et al. [1]. A  $\chi^2$  test performed over the  $L + 1$  bins returns a p-value of  $1.6 * 10^{-191}$ , which rejects the null hypothesis of uniformity.

### Two-parameter case

In the two-parameter case, the shortest thinned chains contain 8 iterations. However, for many samples (93 out of the total 1666), it was not possible to find an ESS value that eliminated auto-correlation — even if we use  $L = 8$  to eliminate the need for a rank approximation, we expect that auto-correlation would still be present. We present the results with  $L = 8$  in Fig 1.

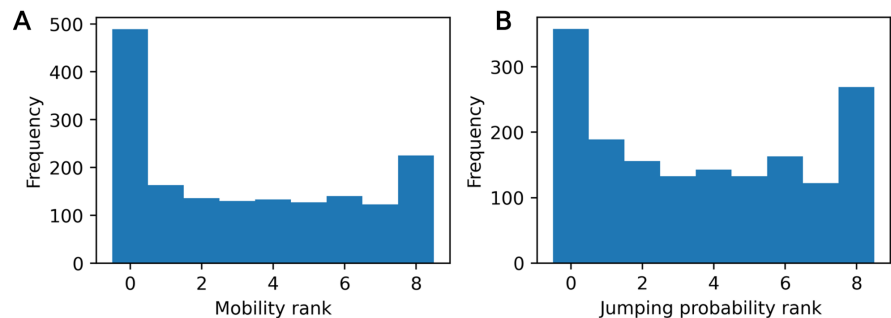

**Fig 1. SBC results for calibration method 1.** (A) SBC histogram in the two-parameter case over the mobility parameter. (B) SBC histogram in the two-parameter case over the jumping probability parameter.

The SBC histograms for both the mobility and jumping probability (Fig 1) display non-uniformity (from a  $\chi^2$  test, mobility p-value =  $2.78 * 10^{-125}$ , jumping probability p-value =  $3.81 * 10^{-53}$ ), but it may not be due solely to incorrect posterior inference, since there is still some auto-correlation in the posterior samples  $\theta_1, \dots, \theta_L$ . However, given the level of non-uniformity, the small number of auto-correlated samples, and the similar failure in the one-parameter case, it appears likely that the non-uniformity observed in the SBC histogram is not solely due to the remaining auto-correlation in samples, but also in part due to incorrect posterior inference.

## References

1. Talts S, Betancourt M, Simpson D, Vehtari A, Gelman A. Validating Bayesian Inference Algorithms with Simulation-Based Calibration; 2020. Available from: <http://arxiv.org/abs/1804.06788>.
